# Supplementary material
Source: PubMed Central journal article supplement (PMC3318704)
Supplement: supp_M111.332593_jbc.M111.332593-1.pdf [file supp_M111.332593_jbc.M111.332593-1.pdf]

## RT-PCR

*Oasis*-rev(mouse/human) GAACATGGAGGACTTCTCCAATG  
*Oasis*-rev(mouse/human) CGGGCTCTGCTCCTGCTTCAC

*Muc2*-fwd (mouse) ACCTCCAGGTTCAACACCAG  
*Mus2*-rev (mouse) ATGGCAGTCCAGAGAGCAGT

*Agr2*-fwd (mouse) CGATCAGCTCATCTGGACTCAGAC  
*Agr2*-rev (mouse) AGCCGGTTTGAGTATCGCCAGTG

*Retnlb*-fwd (mouse) ATCCTCGTCTCCCTTCTCCCCTG  
*Retnlb*-rev (mouse) TTAAGCCATTCGGCAGCAGCGGGCA

*Tff3*-fwd ATGGAGACCAGAGCCCTCTGGCTAATGCTG  
*Tff3*-rev TCAAAATGTGCATTCTGTCTCCTGCAGAG

*Dll1*-fwd ATGGGCCGTCGGAGCGCGCTAGCCCTTG  
*Dll1*-rev CGGTAAGAGTACCGGAGGTCTGTG

*Atoh1*-fwd AATGACCACCATCACCTTCG  
*Atoh1*-rev TGTGGGATCTGGGAGATGTT

*Gfi1*-fwd AGGAACGCAGCTTTGACCTGT  
*Gfi1*-rev CCTGTGTGGATGAAGGTGTG

*Hes1*-fwd AGAGGCTGCCAAGGTTTTTG  
*Hes1*-rev TCCCCTGTTGCTGGTGTAGA

*Spdef*-fwd (mouse) GTTGCCTGCTACTGTTCCCAGATG  
*Spdef*-rev (mouse) AAAGCCACTTCTGCACGTTACCAG

*Creb4*-fwd (mouse/human) CCTCACCAAGGCAGAGGAGAG  
*Creb4*-rev (mouse/human) CTGGGCAGGATGATGAGAGCC

*Muc2*-fwd (human) CAGCACCGATTGCTGAGTTG  
*Muc2*-rev (human) GCTGGTCATCTCAATGGCAG

*Agr2*-fwd (human) CGATCAGCTCATCTGGACTCAGAC  
*Agr2*-rev (human) GCTGGTCATCTCAATGGCAG

*Spdef*-fwd (human) CGAAGTGCTCAAGGACATCGAG  
*Spdef*-rev (human) CGGTATTGGTGCTCTGTCCACA

*Bip*-fwd (human) GTTTGCTGAGGAAGACAAAAGCTC  
*Bip*-rev (human) CACTTCCATAGAGTTTGCTGATAAT

*Chop*-fwd (human) GTCCAGCTGGGAGCTGGAAG  
*Chop*-rev (human) CTGACTGGAATCTGGAGAG

*$\beta$ -actin*-fwd(mouse/human) TCCTCCCTGGAGAAGAGCTAC  
 *$\beta$ -actin*-rev (mouse/human) TCCTGCTTGCTGATCCACAT

## Probe

920bp fragment of mouse *Oasis* cDNA (NM011957.2 1090 to 2010)

379bp fragment of mouse *Muc2* cDNA (NM023566.2 411 to 4489)

427bp fragment of mouse *Tff3* cDNA (NM011575.2 20 to 447)

400bp fragment of mouse *Spdef* cDNA (NM013891 473 to 873)

732bp fragment of mouse *Gapdh* cDNA (NM008084 498 to 1230)
